# Supplementary figures and images for: Proximal pulmonary arterial wall disease in patients with persistent pulmonary hypertension after successful left-sided valve replacement according to the hemodynamic phenotype
Source: PubMed Central journal article supplement — Pulm Circ. 2018 Dec 4;9(1):2045894018816972. doi: 10.1177/2045894018816972 (PMC6295709; doi:10.1177/2045894018816972), 2018-12-04

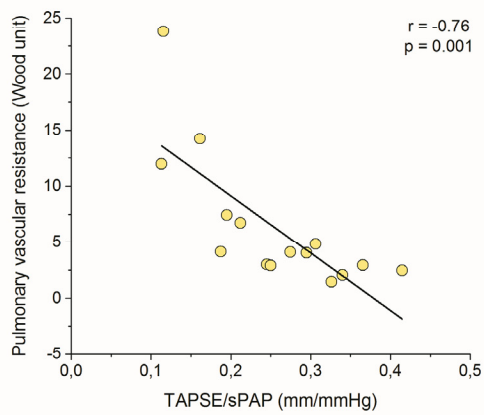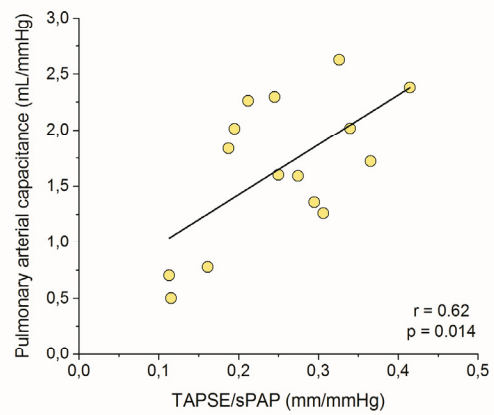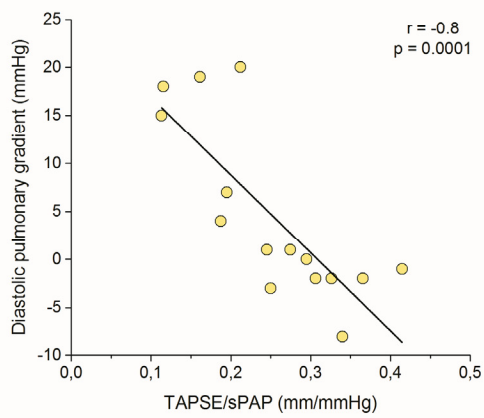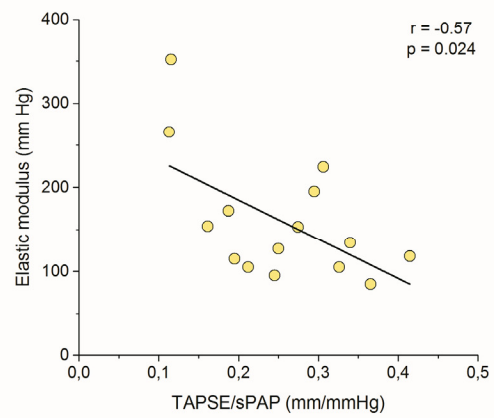

Supplement: Supplemental_Material.pdf [file Supplemental_Material.pdf]
